# Supplementary material
Source: PubMed Central journal article supplement (PMC3528983)
Supplement: tjp0590-5653-SD1.pdf [file tjp0590-5653-SD1.pdf]

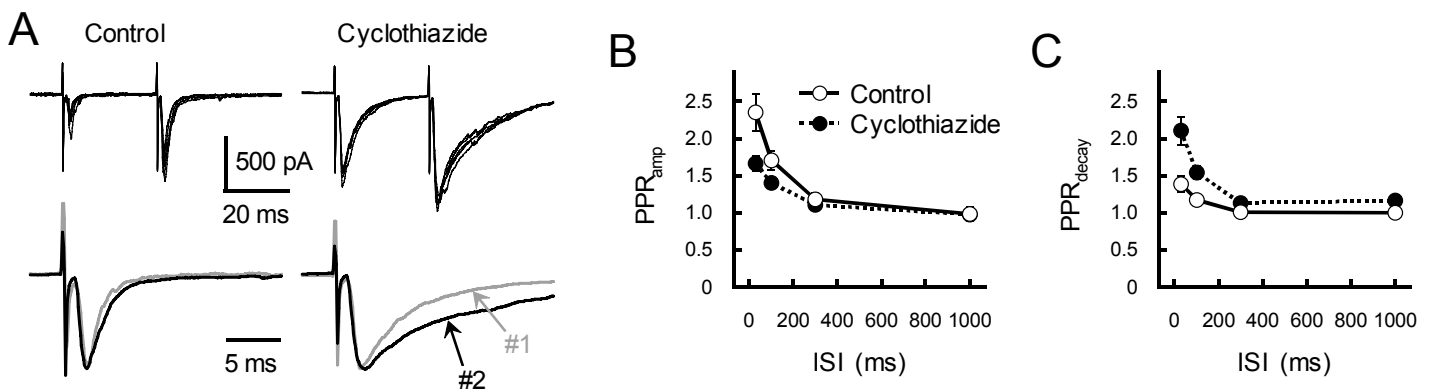

**Satake et al., Supplementary Figure 1. Effects of the AMPAR desensitization blocker cyclothiazide on GC-IN synaptic transmission**

*A, Top*, GC axons were repetitively stimulated with an ISI of 30 ms. Traces represent superimpositions of five successive EPSCs recorded from a single IN before (*left*) and during (*right*) treatment with cyclothiazide (50  $\mu$ M). *Bottom*, Averaged traces of the first (*grey traces*) and second (*black traces*) EPSCs were scaled to the same peak amplitude. *B, C*, Relationship between ISI and the PPR<sub>amp</sub> (*B*) and the PPR<sub>decay</sub> (*C*) before (control, *open circles*) and during (*closed circles*) treatment with cyclothiazide. Each point represents the mean  $\pm$  SEM ( $n = 9$ ).
